# Supplementary material
Source: PubMed Central journal article supplement (PMC10346502)
Supplement: jamaoncol-e232150-s003.pdf [file jamaoncol-e232150-s003.pdf]

| <b>*Group Name(s): The METEORA-II (Metronomic Treatment Option in Advanced Breast Cancer) Trial Investigators and the International Breast Cancer Study Group (IBCSG) Participants</b> |                   |                              |                         |                                                                                   |                                                 |                                                                 |                                                                                                   |
|----------------------------------------------------------------------------------------------------------------------------------------------------------------------------------------|-------------------|------------------------------|-------------------------|-----------------------------------------------------------------------------------|-------------------------------------------------|-----------------------------------------------------------------|---------------------------------------------------------------------------------------------------|
| <b>*First Name and Middle Initial(s)</b>                                                                                                                                               | <b>*Last Name</b> | <b>*Suffix (eg, Jr, III)</b> | <b>Academic Degrees</b> | <b>Institution</b>                                                                | <b>Location (city, state/province, country)</b> | <b>Role or Contribution, eg, chair, principal investigator</b>  | <b>Group (if more than 1 Group listed in the byline) and/or Subgroup (eg, Steering Committee)</b> |
| Angelo                                                                                                                                                                                 | Di Leo            |                              | MD, PhD                 | Department of Medical Oncology, New Hospital of Prato S. Stefano                  | Prato, Italy                                    | Former IBCSG Scientific Committee Co-Chair                      |                                                                                                   |
| Rolf A                                                                                                                                                                                 | Stahel            |                              | MD                      | ETOP IBCSG Partners Foundation                                                    | Bern, Switzerland                               | ETOP IBCSG Partners Foundation Board President                  |                                                                                                   |
| Stefan                                                                                                                                                                                 | Aebi              |                              | MD, PhD                 | ETOP IBCSG Partners Foundation                                                    | Bern, Switzerland                               | ETOP IBCSG Partners Foundation Board                            |                                                                                                   |
| Paul                                                                                                                                                                                   | Baas              |                              | MD, PhD                 | ETOP IBCSG Partners Foundation                                                    | Bern, Switzerland                               | ETOP IBCSG Partners Foundation Board                            |                                                                                                   |
| Richard D                                                                                                                                                                              | Gelber            |                              | PhD                     | IBCSG Statistical Center, Division of Biostatistics, Dana-Farber Cancer Institute | Bern, Switzerland                               | ETOP IBCSG Partners Foundation Board; IBCSG Senior Statistician |                                                                                                   |
| Keith                                                                                                                                                                                  | McGregor          |                              | PhD                     | ETOP IBCSG Partners Foundation                                                    | Bern, Switzerland                               | ETOP IBCSG Partners Foundation Board                            |                                                                                                   |
| Solange                                                                                                                                                                                | Peters            |                              | MD, PhD                 | ETOP IBCSG Partners Foundation                                                    | Bern, Switzerland                               | ETOP IBCSG Partners Foundation Board                            |                                                                                                   |
| Sanjay                                                                                                                                                                                 | Popat             |                              | PhD                     | ETOP IBCSG Partners Foundation                                                    | Bern, Switzerland                               | ETOP IBCSG Partners Foundation Board                            |                                                                                                   |
| Rafael                                                                                                                                                                                 | Rosell            |                              | MD, PhD                 | ETOP IBCSG Partners Foundation                                                    | Bern, Switzerland                               | ETOP IBCSG Partners Foundation Board                            |                                                                                                   |
| Anita                                                                                                                                                                                  | Hiltbrunner       |                              | MBA                     | ETOP IBCSG Partners Foundation Coordinating Center                                | Bern, Switzerland                               | Director                                                        |                                                                                                   |
| Giuseppe                                                                                                                                                                               | Achille           |                              | MSc                     | ETOP IBCSG Partners Foundation Coordinating Center                                | Bern, Switzerland                               | Trial Monitor                                                   |                                                                                                   |
| Anne                                                                                                                                                                                   | Carrer-Wagner     |                              | MSc                     | ETOP IBCSG Partners Foundation Coordinating Center                                | Bern, Switzerland                               | Scientific Regulatory Coworker                                  |                                                                                                   |
| Daniela                                                                                                                                                                                | Celotto           |                              | PharmD                  | ETOP IBCSG Partners Foundation Coordinating Center                                | Bern, Switzerland                               | Trial Monitor                                                   |                                                                                                   |
| Carmen                                                                                                                                                                                 | Comune            |                              | MSc                     | ETOP IBCSG Partners Foundation Coordinating Center                                | Bern, Switzerland                               | Trial Monitor                                                   |                                                                                                   |
| Adriana                                                                                                                                                                                | Gasca             |                              | MD                      | ETOP IBCSG Partners Foundation Coordinating Center                                | Bern, Switzerland                               | Medical Reviewer                                                |                                                                                                   |
| Nino                                                                                                                                                                                   | Giacomelli        |                              | MSc                     | ETOP IBCSG Partners Foundation Coordinating Center                                | Bern, Switzerland                               | Scientific Administrator                                        |                                                                                                   |
| Roswitha                                                                                                                                                                               | Kammler           |                              | BA                      | ETOP IBCSG Partners Foundation Coordinating Center                                | Bern, Switzerland                               | Head Translational Research                                     |                                                                                                   |
| Rita                                                                                                                                                                                   | Pfister           |                              | PharmD                  | ETOP IBCSG Partners Foundation Coordinating Center                                | Bern, Switzerland                               | Deputy Head Safety and Regulator Office                         |                                                                                                   |
| Heidi                                                                                                                                                                                  | Roschitzki        |                              | PhD                     | ETOP IBCSG Partners Foundation Coordinating Center                                | Bern, Switzerland                               | Head Trial Activities / Deputy Director                         |                                                                                                   |
| Monica                                                                                                                                                                                 | Ruggeri           |                              | BA                      | ETOP IBCSG Partners Foundation Coordinating Center                                | Bern, Switzerland                               | Head Young Patient Programs                                     |                                                                                                   |
| Elizabeth                                                                                                                                                                              | Rugiati           |                              | BA                      | ETOP IBCSG Partners Foundation Coordinating Center                                | Bern, Switzerland                               | Project Manager Quality Assurance and Audit                     |                                                                                                   |
| Mirjam                                                                                                                                                                                 | Schneider         |                              | MSc                     | ETOP IBCSG Partners Foundation Coordinating Center                                | Bern, Switzerland                               | Scientific Pharmacovigilance Collaborator                       |                                                                                                   |
| Judith                                                                                                                                                                                 | Schroeder         |                              | PhD                     | ETOP IBCSG Partners Foundation Coordinating Center                                | Bern, Switzerland                               | Head Quality Assurance and Audit Office                         |                                                                                                   |
| Sandra                                                                                                                                                                                 | Troesch           |                              | MSc                     | ETOP IBCSG Partners Foundation Coordinating Center                                | Bern, Switzerland                               | Scientific Collaborator                                         |                                                                                                   |

## Supplemental Online Content: Nonauthor Collaborators

\*First name, last name, and suffix (if applicable) are required and will appear in PubMed.

| *First Name and Middle Initial(s) | *Last Name   | *Suffix (eg, Jr, III) | Academic Degrees | Institution                                                                       | Location (city, state/province, country) | Role or Contribution, eg, chair, principal investigator | Group (if more than 1 Group listed in the byline) and/or Subgroup (eg, Steering Committee) |
|-----------------------------------|--------------|-----------------------|------------------|-----------------------------------------------------------------------------------|------------------------------------------|---------------------------------------------------------|--------------------------------------------------------------------------------------------|
| Colleen                           | Bouzan       |                       | MS               | IBCSG Statistical Center, Division of Biostatistics, Dana-Farber Cancer Institute | Boston, MA, USA                          | Project Manager                                         |                                                                                            |
| Subrina                           | Farah        |                       | MS               | IBCSG Statistical Center, Division of Biostatistics, Dana-Farber Cancer Institute | Boston, MA, USA                          | Former trial statistician                               |                                                                                            |
| Zhuoxin                           | Sun          |                       | PhD              | IBCSG Statistical Center, Division of Biostatistics, Dana-Farber Cancer Institute | Boston, MA, USA                          | Former trial statistician                               |                                                                                            |
| Holly                             | Shaw         |                       | MS               | IBCSG Data Management Center, Frontier Science Foundation                         | Amherst, NY, USA                         | Director                                                |                                                                                            |
| Lynette                           | Blacher      |                       | MLS              | IBCSG Data Management Center, Frontier Science Foundation                         | Amherst, NY, USA                         | Former Director                                         |                                                                                            |
| Colleen                           | King         |                       | MLS              | IBCSG Data Management Center, Frontier Science Foundation                         | Amherst, NY, USA                         | Data Manager/Trial Coordinator                          |                                                                                            |
| Leslie                            | Mundy        |                       | MS               | IBCSG Data Management Center, Frontier Science Foundation                         | Amherst, NY, USA                         | Documentation and Protocol Specialist                   |                                                                                            |
| Dorene                            | Polizzi      |                       | BA               | IBCSG Data Management Center, Frontier Science Foundation                         | Amherst, NY, USA                         | Data Manager/Trial Coordinator                          |                                                                                            |
| Monica                            | Greco        |                       | BS               | IBCSG Data Management Center, Frontier Science Foundation                         | Amherst, NY, USA                         | Data Manager                                            |                                                                                            |
| Karolyn                           | Scott        |                       | BS               | IBCSG Data Management Center, Frontier Science Foundation                         | Amherst, NY, USA                         | Former Data Management Section Head                     |                                                                                            |
| Robert                            | Starkweather |                       | MS               | IBCSG Data Management Center, Frontier Science Foundation                         | Amherst, NY, USA                         | Head of IBCSG Programming Projects                      |                                                                                            |
| Raffaella                         | Ghisini      |                       | MSc              | IEO, European Institute of Oncology, IRCCS                                        | Milan, Italy                             | Trial Contact in Italy                                  |                                                                                            |
| Roberto                           | Masetti      |                       | MD               | Fondazione Policlinico Gemelli - Universita Cattolica de                          | Rome, Italy                              | Site Principal Investigator                             |                                                                                            |
| Laura                             | Amaducci     |                       | MD               | Santa Maria delle Croci Hospital                                                  | Ravenna, Italy                           | Site Principal Investigator                             |                                                                                            |
| Ugo                               | De Giorgi    |                       | MD               | IRCCS Istituto Romagnolo per lo Studio dei Tumori (IRS                            | Meldola, Italy                           | Site Principal Investigator                             |                                                                                            |
| Graziella                         | Pinotti      |                       | MD               | ASST Settelaghi – Ospedale di Circolo e Fondazione Ma                             | Varese, Italy                            | Site Principal Investigator                             |                                                                                            |
| Michela                           | Donadio      |                       | MD               | AOU Citta della Salute e della Scienza di Torino                                  | Torino, Italy                            | Site Principal Investigator                             |                                                                                            |
| Aron                              | Goldhirsch   |                       | MD               | IEO, European Institute of Oncology, IRCCS                                        | Milan, Italy                             | Former IBCSG Scientific Committee Co-Chair              |                                                                                            |
