# Supplementary material
Source: PubMed Central journal article supplement (PMC10346502)
Supplement: jamaoncol-e232150-s004.pdf [file jamaoncol-e232150-s004.pdf]

## Data Sharing Statement

Munzone. Efficacy of Metronomic Oral Vinorelbine, Cyclophosphamide, and Capecitabine vs Weekly Intravenous Paclitaxel in Patients With Estrogen Receptor–Positive, ERBB2-Negative Metastatic Breast Cancer. *JAMA Oncol*. Published July 13, 2023.  
doi:10.1001/jamaoncol.2023.2150

### Data

**Data available:** Yes

**Data types:** Deidentified participant data, Data dictionary

**How to access data:** After publication, access to de-identified individual participant data may be requested by researchers by submitting a proposal (to [stat\\_center@ibcsg.org](mailto:stat_center@ibcsg.org)), which will be reviewed for scientific merit and feasibility in accordance with the guidelines for collaborative research and data sharing policy for IBCSG trials (available at <https://www.ibcsg.org/en/patients-professionals/research-collaboration>).

**When available:** With publication

### Supporting Documents

**Document types:** None
